# Supplementary material for: Cereulide Exposure Caused Cytopathogenic Damages of Liver and Kidney in Mice
Source: MDPI journal article supplement (doi:10.3390/ijms22179148), 2021-08-24
Supplement: s1 [file s1]

**Table S1 Primer sequences used for RT-qPCR analysis (F: forward; R: reverse)**

| Group               | Liver weight<br>/Body weight (%) | Kidney weight<br>/Body weight (%) | Spleen weight<br>/Body weight (%) |
|---------------------|----------------------------------|-----------------------------------|-----------------------------------|
| Control             | 4.17±0.068                       | 1.58±0.038                        | 2.95±0.17                         |
| 200 µg/kg Cereulide | 3.95±0.063*                      | 1.65±0.038*                       | 3.68±0.25*                        |
| 50 µg/kg Cereulide  | 4.00±0.046                       | 1.66±0.018*                       | 3.34±0.22                         |
| 10 µg/kg Cereulide  | 3.99±0.022                       | 1.63±0.042                        | 3.21±0.086                        |

**Table S2 Effect of Cereulide Exposure on Organ index in Mice**

| Primer name   | Primer sequence (5'-3')                                    |
|---------------|------------------------------------------------------------|
| Mouse IL-6    | F: ACCTGTCTATACCACTTCACAAGT<br>R: TCTGCAAGTGCATCATCGTTGTTC |
| Mouse TNF-α   | F: CCAGACCCTCACACTCAGATC<br>R: AGTTGGTTGTCTTTGAGATCCATG    |
| Mouse IL-10   | F: GGTTGCCAAGCCTTATCGGA<br>R: ACCTGCTCCACTGCCTTGCT         |
| Mouse GAPDH   | F: GAGAAACCTGCCAAGTATGATGAC<br>R: TAGCCGTATTCATTGTCATACCAG |
| Mouse BIP     | F: CGACCTGGGGACCACCTACT<br>R: TTGGAGGTGAGCTGGTTCTT         |
| Mouse ATF4    | F: CATGGCGTATTAGAGGCAGC<br>R: AACTGCTGCTGGATTTCGT          |
| Mouse Xbp1(s) | F: ACACGCTTGGAATGGACAC<br>R: CCATGGGAAGATGTTCTGGG          |
| Mouse Xbp1(u) | F: ACACGCTTGGAATGGACAC<br>R: GAGTTTTCTCCCGTAAAAGCTGA       |
| Mouse IRE1α   | F: GCCCCGGGAGTTTTGG<br>R: GGGTCGAGACAAACAACAAGGT           |

Data are shown as the mean  $\pm$  SD (n = 5), \*  $p < 0.05$  when compared to the control group.

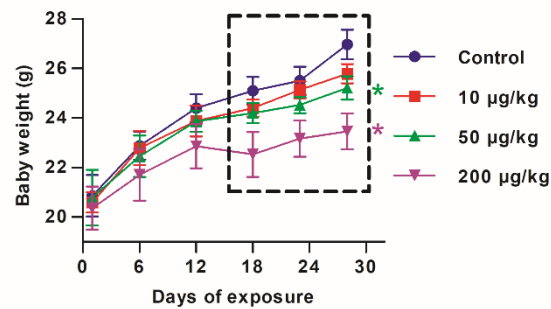

**Figure S1** Effect of cereulide exposure on the body weight in mice

Mice were exposed to 50 and 200 µg/kg of cereulide for 28 days, and their body weights were significantly lower than that of the control group from day 18th to day 28th. \*  $p < 0.05$  compared to the control group.

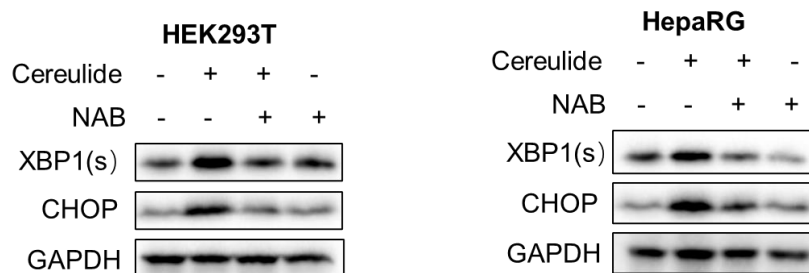

**Figure S2** NaB inhibits ER stress caused by cereulide in HepaRG and HEK293T cells

Western blot analysis for p-eIF2 $\alpha$ , XBP1(s) and CHOP in HepaRG and HEK293T cells that were untreated or treated with cereulide (0.3 ng/mL) with or without NaB (0.5 mM) for 48 h.
